# Supplementary material for: Alcohol Consumption within 48 hours before Onset Is Associated with Adverse Clinical Outcomes in Hypertriglyceridemic Pancreatitis
Source: J Clin Med. 2023 Mar 29;12(7):2566. doi: 10.3390/jcm12072566 (PMC10095359; doi:10.3390/jcm12072566)
Supplement: Supplementary file 1 [file jcm-12-02566-s001.zip › jcm-2188313-supplementary.pdf]

## Supplemental Tables

**Table S1. Definitions of primary and secondary outcomes**

| Define terms                   | Definition                                                                                                         | Reference                                    |
|--------------------------------|--------------------------------------------------------------------------------------------------------------------|----------------------------------------------|
| SAP                            | Presence of organ failure for more than 48 hours                                                                   | [14] Gut. 2013;62(1):102-11                  |
| Necrotizing pancreatitis       | A nonenhanced area of the pancreatic parenchyma, peripancreatic tissue, or both on contrast-enhanced CT            | [14] Gut. 2013;62(1):102-11                  |
| Persistent organ failure       | Organ failure for more than 48 hours                                                                               | [14] Gut. 2013;62(1):102-11                  |
| Persistent respiratory failure | PaO <sub>2</sub> /FiO <sub>2</sub> < 300 for more than 48 hours                                                    | [14] Gut. 2013;62(1):102-11                  |
| Persistent renal failure       | Serum creatinine level > 177 µmol/L after rehydration for more than 48 hours                                       | [14] Gut. 2013;62(1):102-11                  |
| Persistent circulatory failure | Systolic blood pressure < 90 mmHg, despite adequate fluid resuscitation                                            | [14] Gut. 2013;62(1):102-11                  |
| Persistent MOF                 | Failure of two or more organs for more than 48 hours                                                               | [14] Gut. 2013;62(1):102-11                  |
| ACS                            | A sustained intra-abdominal pressure (IAP) > 20 mmHg that is associated with new organ dysfunction/failure         | [24] Intensive Care Med. 2013;39(7):1190-206 |
| Sepsis                         | The presence of infection as well as the systemic manifestations based on the surviving sepsis campaign (SSC) 2012 | [25] Intensive Care Med. 2013;39(2):165-228  |

|      |                                                                                                                                                                                                                                                                                                                                                                                                                |                             |
|------|----------------------------------------------------------------------------------------------------------------------------------------------------------------------------------------------------------------------------------------------------------------------------------------------------------------------------------------------------------------------------------------------------------------|-----------------------------|
| IPN  | <p>At least one of the following criteria was met: the presence of extraluminal gas in the pancreatic and/or peripancreatic tissues on contrast-enhanced computed tomography (CECT); a positive bacterial and/or fungi on Gram stain or culture of pancreatic and/or peripancreatic necrotic tissues or fluids obtained by percutaneous fine-needle aspiration or from drainage</p>                            | [14] Gut. 2013;62(1):102-11 |
| APFC | <p>It was diagnosed when the following criteria on CECT were met:(a) Seen in the peripancreatic fluid areas within the first 4 weeks after the onset of interstitial oedematous pancreatitis. (b)Homogeneous collection with fluid density. (c)Confined by normal peripancreatic fascial planes. (d)No definable wall encapsulating the collection. (e)Adjacent to pancreas (no intrapancreatic extension)</p> | [14] Gut. 2013;62(1):102-11 |
| ANC  | <p>It was diagnosed when the following criteria on CECT were met:(a) Seen in the intrapancreatic and/or extrapancreatic collection within the first 4 weeks after the onset of acute necrotizing pancreatitis. (b)Collection containing heterogeneous and non-liquid density of varying degrees(some appear homogeneous early in their course) (c) No definable wall encapsulating the collection.</p>         | [14] Gut. 2013;62(1):102-11 |

|     |                                                                                                                                                                                                                                                                                                                                                                                                                                                                          |
|-----|--------------------------------------------------------------------------------------------------------------------------------------------------------------------------------------------------------------------------------------------------------------------------------------------------------------------------------------------------------------------------------------------------------------------------------------------------------------------------|
| PPC | <p>It was diagnosed when the following criteria on CECT were met:(a)</p> <p>Maturation usually required more than 4 weeks after the onset of</p> <p>interstitial oedematous pancreatitis. (b)Well circumscribed. [14] Gut. 2013;62(1):102-11</p> <p>(c)Homogeneous fluid density. (d)Only liquid component. (e)Well-defined</p> <p>wall(completely encapsulated)</p>                                                                                                     |
| WON | <p>It was diagnosed when the following criteria on CECT were met:(a)</p> <p>Maturation usually required more than 4 weeks after the onset of acute</p> <p>necrotizing pancreatitis. (b)Seen in the intrapancreatic and/or [14] Gut. 2013;62(1):102-11</p> <p>extrapancreatic. (c) Heterogeneous with liquid and non-liquid density with</p> <p>varying degrees of loculations (some may appear homogeneous). (d) Well-</p> <p>defined wall (completely encapsulated)</p> |

SAP, severe acute pancreatitis; MOF, multiple organ failure; ACS, abdominal compartment syndrome; IPN, infected pancreatic necrosis;

APFC, acute peripancreatic fluid collection; ANC, acute necrotic collection; WON, walled-off necrosis

**Table S2. Univariate logistic regression analysis for SAP in OMA group and WA group**

|                 | Unadjusted OR (95% CI) | P     |
|-----------------|------------------------|-------|
| Sex (ref: male) |                        |       |
| Female          | 0.97 (0.56, 1.68)      | 0.905 |
| Age, year       | 1.00 (0.98, 1.02)      | 0.813 |

|                                        |                   |       |
|----------------------------------------|-------------------|-------|
| BMI, kg/m <sup>2</sup>                 | 1.01 (0.95, 1.07) | 0.749 |
| Transfer status (ref: no)              |                   |       |
| Yes                                    | 1.38 (0.90, 2.13) | 0.144 |
| History of smoking (ref: no)           |                   |       |
| Yes                                    | 0.92 (0.59, 1.42) | 0.701 |
| Hypertension (ref: no)                 |                   |       |
| Yes                                    | 1.56 (0.90, 2.68) | 0.110 |
| Diabetes mellitus (ref: no)            |                   |       |
| Yes                                    | 0.91 (0.54, 1.55) | 0.727 |
| Hyperlipidemia (ref: no)               |                   |       |
| Yes                                    | 1.48 (0.90, 2.45) | 0.124 |
| COPD (ref: no)                         |                   |       |
| Yes                                    | 1.79 (0.11-28.84) | 0.682 |
| Coronary artery disease (ref: no)      |                   |       |
| Yes                                    | -                 | 0.979 |
| Drinking status (ref: without alcohol) |                   |       |
| occasional or moderate alcohol         | 1.56 (1.02, 2.39) | 0.042 |

OMA, occasional or moderate alcohol; WA, without alcohol; SAP, severe acute pancreatitis; OR, odds ratio; CI, confidence interval; BMI, body mass index; COPD, chronic obstructive pulmonary disease; P<0.05 was bolded.

**Table S3. Univariate logistic regression analysis for necrotizing pancreatitis in OMA group and WA group**

|                 | Unadjusted OR (95% CI) | P     |
|-----------------|------------------------|-------|
| Sex (ref: male) |                        |       |
| Female          | 0.79 (0.45, 1.39)      | 0.419 |
| Age, year       | 1.02 (1.00, 1.04)      | 0.082 |

|                                        |                   |       |
|----------------------------------------|-------------------|-------|
| BMI, kg/m <sup>2</sup>                 | 0.99 (0.93, 1.06) | 0.805 |
| Transfer status (ref: no)              |                   |       |
| Yes                                    | 1.86 (1.19, 2.90) | 0.007 |
| History of smoking (ref: no)           |                   |       |
| Yes                                    | 1.18 (0.77, 1.83) | 0.445 |
| Hypertension (ref: no)                 |                   |       |
| Yes                                    | 1.39 (0.81, 2.41) | 0.234 |
| Diabetes mellitus (ref: no)            |                   |       |
| Yes                                    | 0.95 (0.56, 1.62) | 0.852 |
| Hyperlipidemia (ref: no)               |                   |       |
| Yes                                    | 0.90 (0.54, 1.52) | 0.703 |
| COPD (ref: no)                         |                   |       |
| Yes                                    | 1.85 (0.12-29.88) | 0.663 |
| Coronary artery disease (ref: no)      |                   |       |
| Yes                                    | -                 | 0.979 |
| Drinking status (ref: without alcohol) |                   |       |
| occasional or moderate alcohol         | 1.60 (1.04, 2.46) | 0.031 |

OMA, occasional or moderate alcohol; WA, without alcohol; OR, odds ratio; CI, confidence interval; BMI, body mass index; COPD, chronic obstructive pulmonary disease; P<0.05 was bolded.

**Table S4. Comparison of clinical characteristics in patients in DW group and WDW group**

| Variables        | Total      | DW group (n=56) | WDW group (n=132) | P |
|------------------|------------|-----------------|-------------------|---|
| Sex(male), n (%) | 180 (95.7) | 54 (96.4)       | 126 (95.5)        | 1 |

|                              |                  |                  |                  |       |
|------------------------------|------------------|------------------|------------------|-------|
| Age, years, IQR              | 42.0 (35.0-47.0) | 41.0 (34.8-45.2) | 42.0 (35.0-48.0) | 0.280 |
| BMI, kg/m <sup>2</sup> , IQR | 26.1 (24.2-27.8) | 25.8 (24.1-26.9) | 26.3 (24.2-27.9) | 0.303 |
| Transfer status, n (%)       | 110 (58.5)       | 37 (66.1)        | 73 (55.3)        | 0.171 |
| History of smoking, n (%)    | 116 (61.7)       | 29 (51.8)        | 87 (65.9)        | 0.068 |
| Comorbidities, n (%)         |                  |                  |                  |       |
| Hypertension                 | 31 (16.5)        | 5 (8.9)          | 26 (19.7)        | 0.069 |
| Diabetes mellitus            | 40 (21.3)        | 10 (17.9)        | 30 (22.7)        | 0.456 |
| Hyperlipidemia               | 44 (23.4)        | 14 (25.0)        | 30 (22.7)        | 0.736 |
| COPD                         | 1 (0.5)          | 0 (0)            | 1 (0.8)          | 1     |
| Coronary artery disease      | 1 (0.5)          | 0 (0)            | 1 (0.8)          | 1     |

DW, drinking within 48h before onset; WDW, without drinking within 48h before onset; IQR, Interquartile Range; BMI, body mass index; COPD, chronic obstructive pulmonary disease

**Table S5. Comparison of clinical scoring systems and laboratory findings in patients in DW group and WDW group**

| Variables                            | Total            | DW (n=56)        | WDW (n=132)      | P            |
|--------------------------------------|------------------|------------------|------------------|--------------|
| Clinical score systems, median (IQR) |                  |                  |                  |              |
| CTSI score $\geq 4$ , n (%)          | 82 (43.6)        | 26 (46.4)        | 56 (42.4)        | 0.613        |
| Ranson score $\geq 3$ , n (%)        | 102 (54.3)       | 27 (48.2)        | 75 (56.8)        | 0.279        |
| APACHE II score $\geq 8$ , n (%)     | 91 (48.4)        | 31 (55.4)        | 60 (45.5)        | 0.214        |
| Laboratory findings, median (IQR)    |                  |                  |                  |              |
| WBC, $\times 10^9/L$                 | 12.6 (10.0-16.0) | 12.9 (10.2-15.2) | 12.6 (10.0-16.0) | 0.921        |
| Hb, g/L,                             | 158 (147-178)    | 158 (148-174)    | 158 (147-180)    | 0.897        |
| HCT, %                               | 44.9 (41.8-49.9) | 45.0 (41.1-48.8) | 44.8 (42.2-50.1) | 0.627        |
| Serum ALT , U/L                      | 25.0 (16.0-36.0) | 25.0 (17.5-36.2) | 25.0 (16.0-35.0) | 0.722        |
| Serum AST , U/L                      | 33.0 (23.0-52.0) | 40.0 (23.0-68.0) | 30.0 (23.0-47.0) | <b>0.045</b> |
| Serum TB , $\mu\text{mol/L}$         | 15.2 (10.7-22.9) | 16.0 (13.0-25.9) | 14.0 (9.9-22.5)  | <b>0.048</b> |
| Serum DB , $\mu\text{mol/L}$         | 3.8 (2.5-5.9)    | 4.1 (2.9-7.8)    | 3.7 (2.4-5.6)    | 0.111        |

|                    |                     |                     |                     |       |
|--------------------|---------------------|---------------------|---------------------|-------|
| Serum TG , mmol/L  | 18.1 (14.0-27.0)    | 20.0 (14.1-27.7)    | 17.9 (14.0-26.0)    | 0.584 |
| Serum GLU , mmol/L | 12.2 (8.5-16.8)     | 10.2 (7.6-15.9)     | 12.5 (9.5-17.1)     | 0.072 |
| Serum BUN , mmol/L | 4.9 (3.5-7.1)       | 5.6 (3.8-8.8)       | 4.6 (3.3-6.4)       | 0.064 |
| Serum Cr , umol/L  | 68.0 (56.1-102.0)   | 70.3 (55.8-158.0)   | 67.6 (56.1-96.1)    | 0.662 |
| Serum Ca, mmol/L   | 2.0 (1.7-2.2)       | 1.9 (1.5-2.2)       | 2.0 (1.8-2.2)       | 0.058 |
| Serum CRP, mg/L    | 250.0 (145.0-384.0) | 248.0 (136.0-368.0) | 257.0 (150.0-388.0) | 0.375 |

DW, drinking within 48h before onset; WDW, without drinking within 48h before onset; IQR, Interquartile Range; CTSI, CT severity index; APACHE II, acute physiology and chronic health evaluation II; WBC: white blood count; Hb, hemoglobin; HCT: hematocrit; ALT: alanine aminotransferase; AST: aspartate transaminase; TB: total bilirubin; DB: direct bilirubin; TG: triglyceride; GLU: glucose; BUN: blood urea nitrogen; Cr: creatinine; Ca: calcium; CRP: c-reactive protein.

**Table S6. Univariate logistic regression analysis for SAP among DW group, WDW group and WA group**

|                           | Unadjusted OR (95% CI) | P     |
|---------------------------|------------------------|-------|
| Sex (ref: male)           |                        |       |
| Female                    | 0.97 (0.56, 1.68)      | 0.905 |
| Age, year                 | 1.00 (0.98, 1.02)      | 0.813 |
| BMI, kg/m <sup>2</sup>    | 1.01 (0.95, 1.07)      | 0.749 |
| Transfer status (ref: no) |                        |       |
| Yes                       | 1.38 (0.90, 2.13)      | 0.144 |

|                                                |                   |         |
|------------------------------------------------|-------------------|---------|
| History of smoking (ref: no)                   |                   |         |
| Yes                                            | 0.92 (0.59, 1.42) | 0.701   |
| Hypertension (ref: no)                         |                   |         |
| Yes                                            | 1.56 (0.90, 2.68) | 0.110   |
| Diabetes mellitus (ref: no)                    |                   |         |
| Yes                                            | 0.91 (0.54, 1.55) | 0.727   |
| Hyperlipidemia (ref: no)                       |                   |         |
| Yes                                            | 1.48 (0.90, 2.45) | 0.124   |
| COPD (ref: no)                                 |                   |         |
| Yes                                            | 1.79 (0.11-28.84) | 0.682   |
| Coronary artery disease (ref: no)              |                   |         |
| Yes                                            | -                 | 0.979   |
| Drinking status (ref: without alcohol)         |                   |         |
| without drinking within 48h before onset (WDW) | 1.16 (0.72, 1.87) | 0.534   |
| drinking within 48h before onset (DW)          | 2.99 (1.62, 5.54) | < 0.001 |

SAP, severe acute pancreatitis; DW, drinking within 48h before onset; WDW, without drinking within 48h before onset; WA, without alcohol; OR, odds ratio; CI, confidence interval; BMI, body mass index; COPD, chronic obstructive pulmonary disease; P<0.05 was bolded.

**Table S7. Univariate logistic regression analysis for necrotizing pancreatitis among DW group, WDW group and WA group**

|                           | Unadjusted OR (95% CI) | P     |
|---------------------------|------------------------|-------|
| Sex (ref: male)           |                        |       |
| Female                    | 0.79 (0.45, 1.39)      | 0.419 |
| Age, year                 | 1.02 (1.00, 1.04)      | 0.082 |
| BMI, kg/m2                | 0.99 (0.93, 1.06)      | 0.805 |
| Transfer status (ref: no) |                        |       |
| Yes                       | 1.86 (1.19, 2.90)      | 0.007 |

|                                                |                   |              |
|------------------------------------------------|-------------------|--------------|
| History of smoking (ref: no)                   |                   |              |
| Yes                                            | 1.18 (0.77, 1.83) | 0.445        |
| Hypertension (ref: no)                         |                   |              |
| Yes                                            | 1.39 (0.81, 2.41) | 0.234        |
| Diabetes mellitus (ref: no)                    |                   |              |
| Yes                                            | 0.95 (0.56, 1.62) | 0.852        |
| Hyperlipidemia (ref: no)                       |                   |              |
| Yes                                            | 0.90 (0.54, 1.52) | 0.703        |
| COPD (ref: no)                                 |                   |              |
| Yes                                            | 1.85 (0.12-29.88) | 0.663        |
| Coronary artery disease (ref: no)              |                   |              |
| Yes                                            | -                 | 0.979        |
| Drinking status (ref: without alcohol)         |                   |              |
| without drinking within 48h before onset (WDW) | 1.26 (0.78, 2.04) | 0.335        |
| drinking within 48h before onset (DW)          | 2.73 (1.48, 5.03) | <b>0.001</b> |

---

DW, drinking within 48h before onset; WDW, without drinking within 48h before onset; WA, without alcohol; OR, odds ratio; CI, confidence interval; BMI, body mass index; COPD, chronic obstructive pulmonary disease; P<0.05 was bolded.
